# Supplementary material for: Monocarbaborane chemistry. Preparation and characterisation of [4-CB8H9]–, the ‘missing’ closo-carbaborane anion
Source: Royal Society of Chemistry journal article supplement (doi:10.1039/b103408c), 2001-01-01
Supplement: b103408c.doc [file b103408c.doc]

**Communication B103408C**

**Monocarbaborane chemistry. Preparation and characterisation of [4-CB8H9],the ‘missing’ *closo*-carbaborane anion.**

Tomáš Jelínek,a Bohumil Štíbr,b Josef Holub,a Mario Bakardjiev,c Drahomír Hnyk,c Daniel L Ormsby,a Colin A. Kilner,a Mark Thornton-Pett,a Hans-Jörg Schanz,b Bernd Wrackmeyerb and John D Kennedyb

a School of Chemistry of the University of Leeds, West Yorkshire, UK LS2 9JT.

b Laboratorium für Anorganische Chemie der Universität Bayreuth, Postfach 101251, Bayreuth, Bayern D-95440.

c Institute of Inorganic Chemistry of the Academy of Sciences of the Czech Republic, 25068 Řež-by Prague, The Czech Republic

d Department of Chemistry of the Imperial College of Science, Technology and Medicine,

Exhibition Road, London, UK SW7 2AY

**Electronic Supplementary Information.**

**NMR spectroscopy and structural and NMR calculations on the [4-CB8H9] anion.**

The results of NMR spectroscopy on bulk samples were consistent with the structure derived from the single-crystal work. The 1H-{11B} and 11B-{1H} spectra of the [4-CB8H9]anion **2** consist of 2 : 4 : 2 patterns of singlets for the cage BH units (quartets and doublets, respectively, in undecoupled spectra), and 1H and 13C-{1H} NMR spectra of **2** each show a broad singlet due the cage CH group [doublet in the 13C-{11B} spectrum, 1*J*(13C-1H) 182 Hz]. The experimental shifts are also consistent with the 11B and 13C shieldings calculated by B3LYP/6-31G*/ GAIO work with various basis sets. The NMR data are summarised as follows:

Observed NMR data, 294-297K, ordered as: assignment (11B)/ppm [(1H) {(13C)/ppm where appropriate}] observed splitting from 1*J*(11B1H)/Hz (relative intensity in parentheses): [PMePh3]+[CB8H9] (CD3CN solution) BH(5,6) +12.85 [+4.35] 145 (2BH), BH(1,2,7,8) –14.40 [+1.46] 150 (4BH), BH(3,9) –20.3 [+0.60] 135 (2BH) and CH(4) – [+4.10] - (1CH). [PBu4]+[CB8H9]- ( CDCl3 solution) BH(5,6) +12.80 [+4.37] 145 (2BH), BH(1,2,7,8) –14.30 [+1.42] 148 (4BH), BH(3,9) –20.3 [+0.64] 136 (2BH) and CH(4) – [+4.13 {+44.5}] - (1CH).

Calculated NMR data: DFT-GIAO//B3LYP/6-31G* (11B)/ppm {(13C)/ppm} values for the *C*2*v*-optimised structure are: B(3,9) +9.7, B(1,2,7,8) –16.0 and B(5,6) –20.9; corresponding HF-GIAO/II//MP2(fc)/6-31G* values are: B(3,9) +16.7, B(1,2,7,8) –11.9, B(5,6) –16.9 and C(4) {+47.6}; and HF-GIAO/II//B3LYP/6-31G* values are B(3,9) +11.0, B(1,2,7,8) –18.5, B(5,6) -25.0, and C(4) {+37.2}.

Calculated B3LYP/6-31G* symmetry-locked C2v coordinates for the [CB8H9]- anion **2** are as follows; the coordinates obtained at the other levels of calculation are available from the relevant authors, d.ormsby@ic.ac.uk and / or [hnyk@iic.cas.cz](mailto:hnyk@iic.cas.cz).

**B3LYP/6-31G* symmetry-locked C2v structure for [CB8H9].**

B 0.000000 0.895037 -1.151936

B 0.000000 -0.895037 -1.151936

B 1.423182 0.000000 -0.828549

B -1.423182 0.000000 -0.828549

B -0.997431 -0.894222 0.551463

B 0.997431 -0.894222 0.551463

B -0.997431 0.894222 0.551463

B 0.997431 0.894222 0.551463

C 0.000000 0.000000 1.450387

H 0.000000 1.757520 -1.984466

H 0.000000 -1.757520 -1.984466

H 2.463357 0.000000 -1.419365

H -2.463357 0.000000 -1.419365

H -1.657647 1.736627 1.086680

H -1.657647 -1.736627 1.086680

H 1.657647 1.736627 1.086680

H 1.657647 -1.736627 1.086680

H 0.000000 0.000000 2.534208
